# Supplementary material
Source: PubMed Central journal article supplement (PMC4360881)
Supplement: NIHMS663806-supplement-1.pdf [file NIHMS663806-supplement-1.pdf]

## Supplementary Figure 1

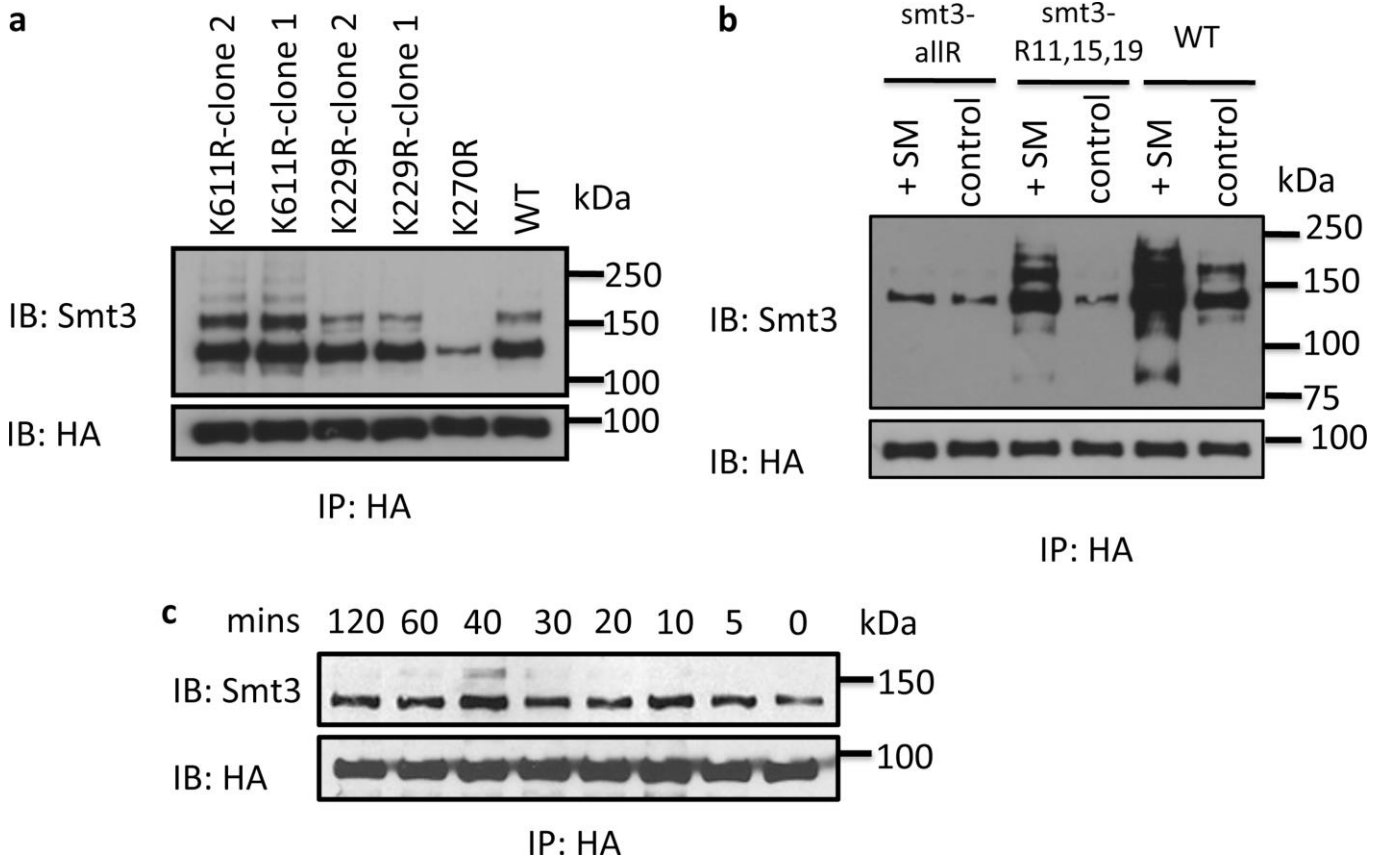

### Characterization of sumoylated Tup1 protein profile

(a) Tup1 K611R mutation results in Tup1 hypersumoylation. HA immunoprecipitations of SM-treated WT, K229R, K270R and K611R mutants were analyzed by HA and yeast SUMO (Smt3) immunoblots.

(b) Tup1 is polysumoylated. HA immunoprecipitations of untreated (control), or SM-treated WT, smt3-R11,15,19 or smt3 allR mutants were analyzed by HA and yeast SUMO (Smt3) immunoblots.

(c) Time-course analysis of Tup1 immunoprecipitation after SM treatment. HA immunoprecipitations of SM-treated WT at the indicated time points were analyzed by HA and yeast SUMO (Smt3) immunoblots.

Supplementary Figure 2

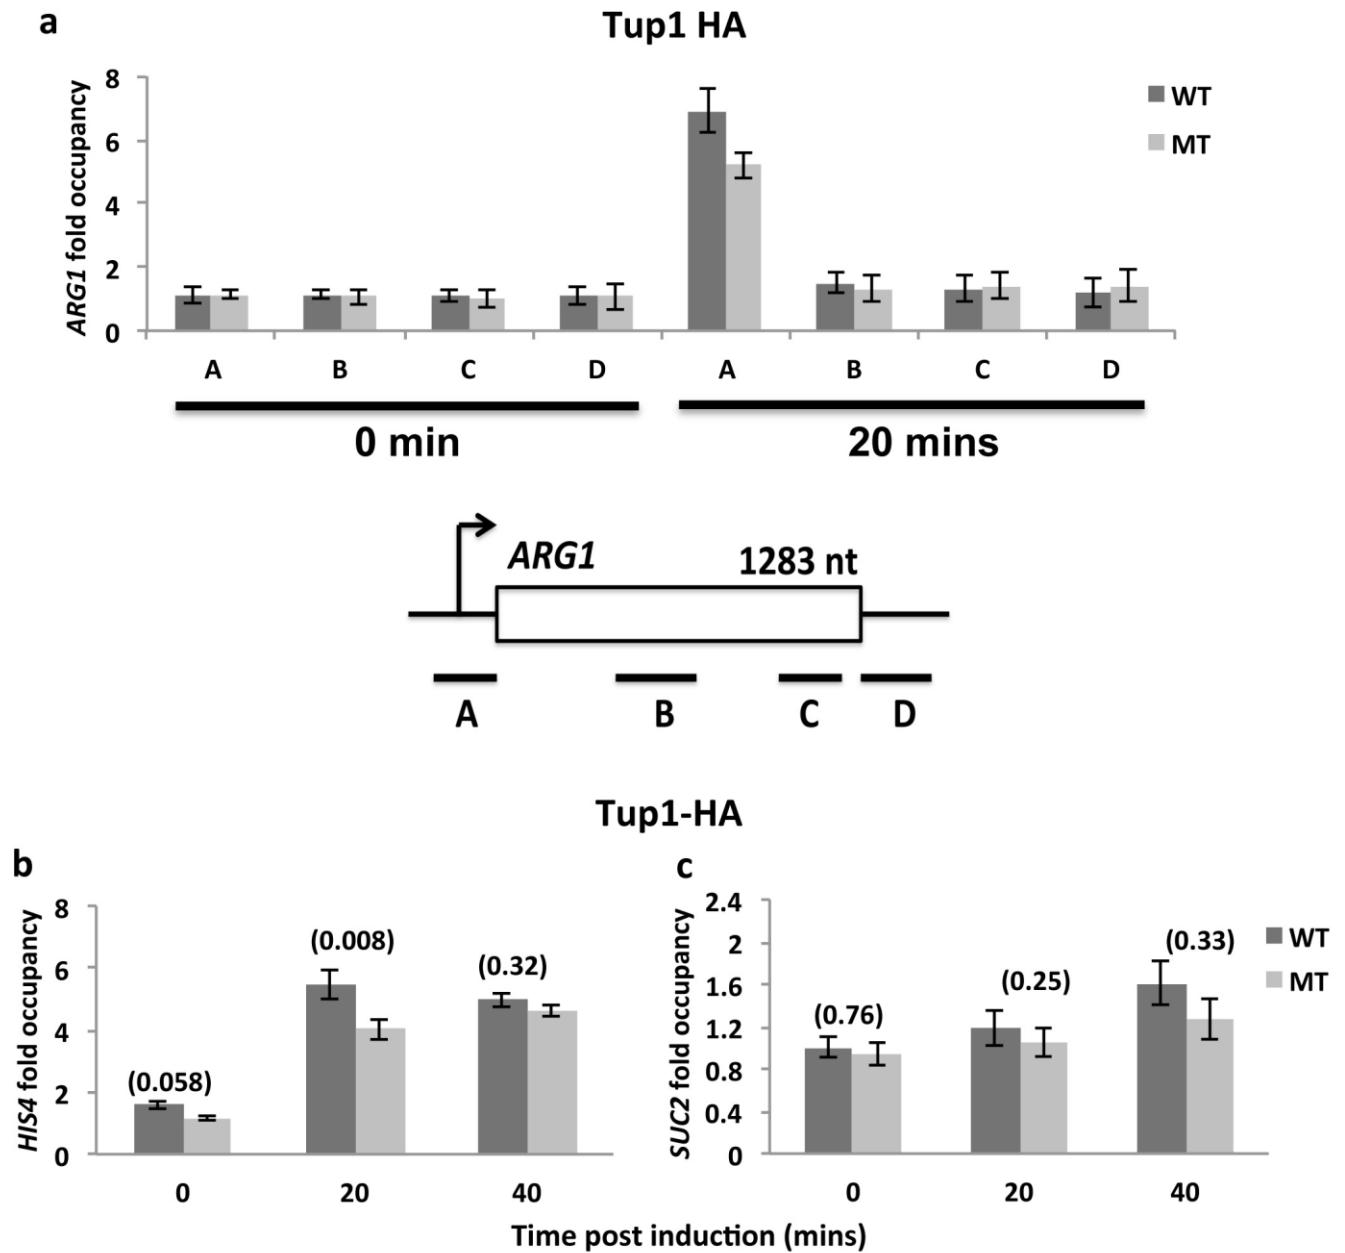

### Characterization of sumoylated Tup1 ChIP profile

(a) Tup1-WT and Tup1-MT(K229,270R) are found mostly on *ARG1* promoter after SM treatment. Tup1-HA ChIP analysis of Tup1-WT or Tup1-MT (K229,270R) on indicated *ARG1* gene positions at 0 and 20 mins after SM treatment and gene diagrams for *ARG1* indicating gene length, approximate position of transcriptional start site (bent arrow), and regions amplified by indicated ChIP primers.

(b-c) Tup1 sumoylation enhances its own association with *HIS4* promoter, but not with *SUC2* promoter after SM treatment. Tup1-HA ChIP analysis of Tup1-WT or Tup1-MT (K229,270R) on (b) *HIS4* and (c) *SUC2* promoters at indicated times after SM induction. Data are represented as mean +/- SD of three independent experiments. *P*-values (refer to Materials and Methods for calculation) are indicated in parentheses above paired bars where relevant.

### Supplementary Figure 3

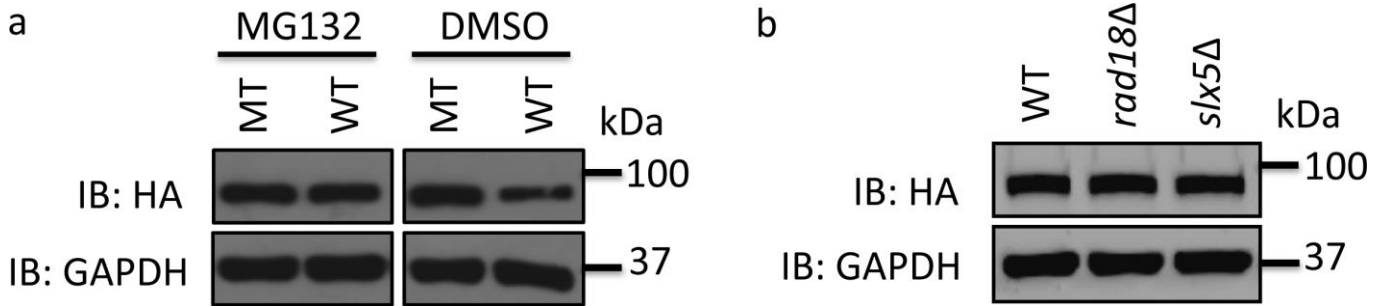

#### **Tup1 protein stability is affected by its sumoylation, but SUMO-targeted ubiquitin ligases Slx5 and Rad18 do not regulate Tup1 protein level**

(a) Tup1-HA immunoblot analysis of extract from yeast cells transformed with Tup1-HA WT or Tup1-HA MT (K229,270R). In order to make cells permeable to MG132, yeast strains were grown at 30°C in a synthetic medium (0.17% yeast nitrogenous base without ammonium sulfate) supplemented with 0.1% proline, appropriate amino acids, and 2% glucose. The overnight culture was reinoculated into 50 ml fresh media with 0.003% SDS at OD of 0.5. The cells were grown for an additional 3 h at 30°C. The transformed cells were either treated with DMSO or MG132. GAPDH was used as a loading control.

(b) Tup1-HA immunoblot analysis of extract from yeast cells (wild-type, *slx5Δ* or *rad18Δ* strains) transformed with Tup1-WT HA protein level. The cells were grown in at 30°C in a synthetic medium (0.17% yeast nitrogenous base without ammonium sulfate) supplemented with 5 g l<sup>-1</sup>, appropriate amino acids, and 2% glucose. GAPDH was used as a loading control.

Supplementary Figure 4

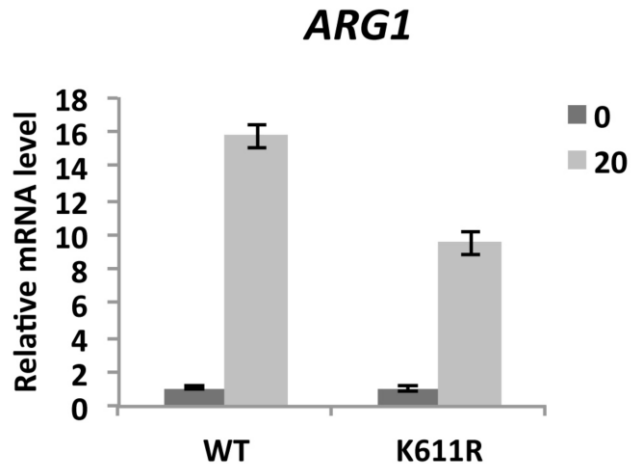

**Hypersumoylated Tup1 results in repression of *ARG1* mRNA gene expression**

Steady-state RNA levels were determined by RT-PCR for Tup1 target gene, *ARG1* and control housekeeping gene, *ACT1* at the indicated time after exposure to SM. Analysis was performed in strains expressing Tup1-WT, or Tup1-K611R as indicated. Values were normalized to *ARG1* RNA level in strain expressing Gcn4-WT and Tup1-WT at 0 min. Data are represented as mean +/- SD of three independent experiments.

### Supplementary Figure 5

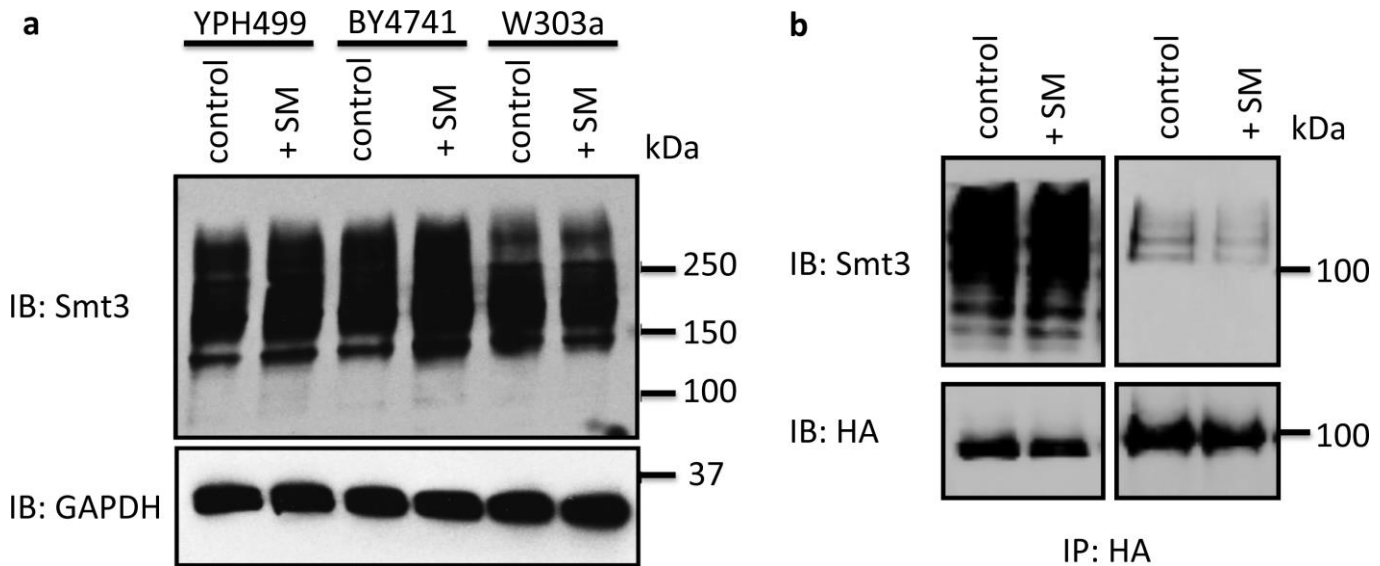

#### Treatment of SM does not result in a global increase in sumoylation

(a) Total sumoylated proteins in three different WT (YPH499, BY4741 and W303a strains) before and after SM treatment were determined by Western blot analysis. GAPDH was used a loading control.

(b) SM treatment does not result in an increase in Tfg1 sumoylation level. HA immunoprecipitations of control (untreated) and SM-treated Tfg1-HA tagged wild-type strains were analyzed by HA and yeast SUMO (Smt3) immunoblots.

## Supplementary Figure 6

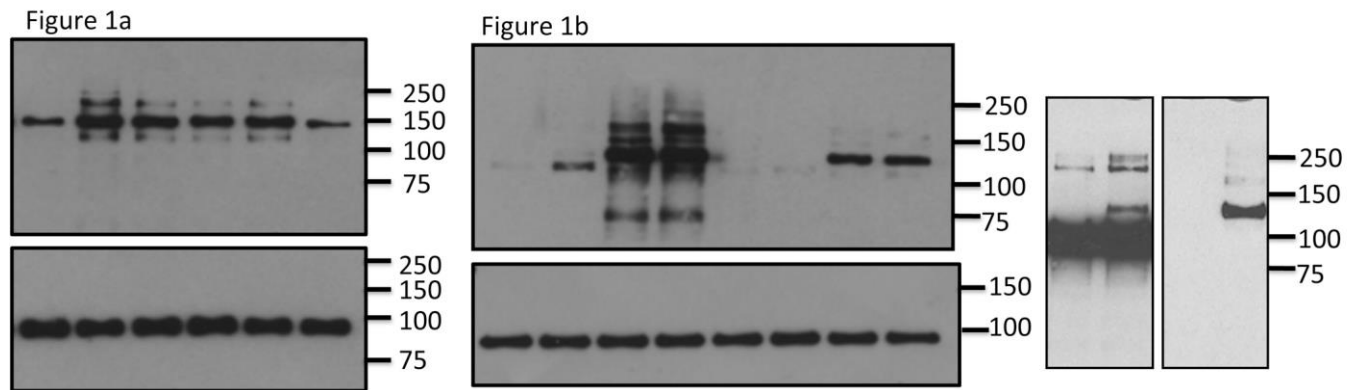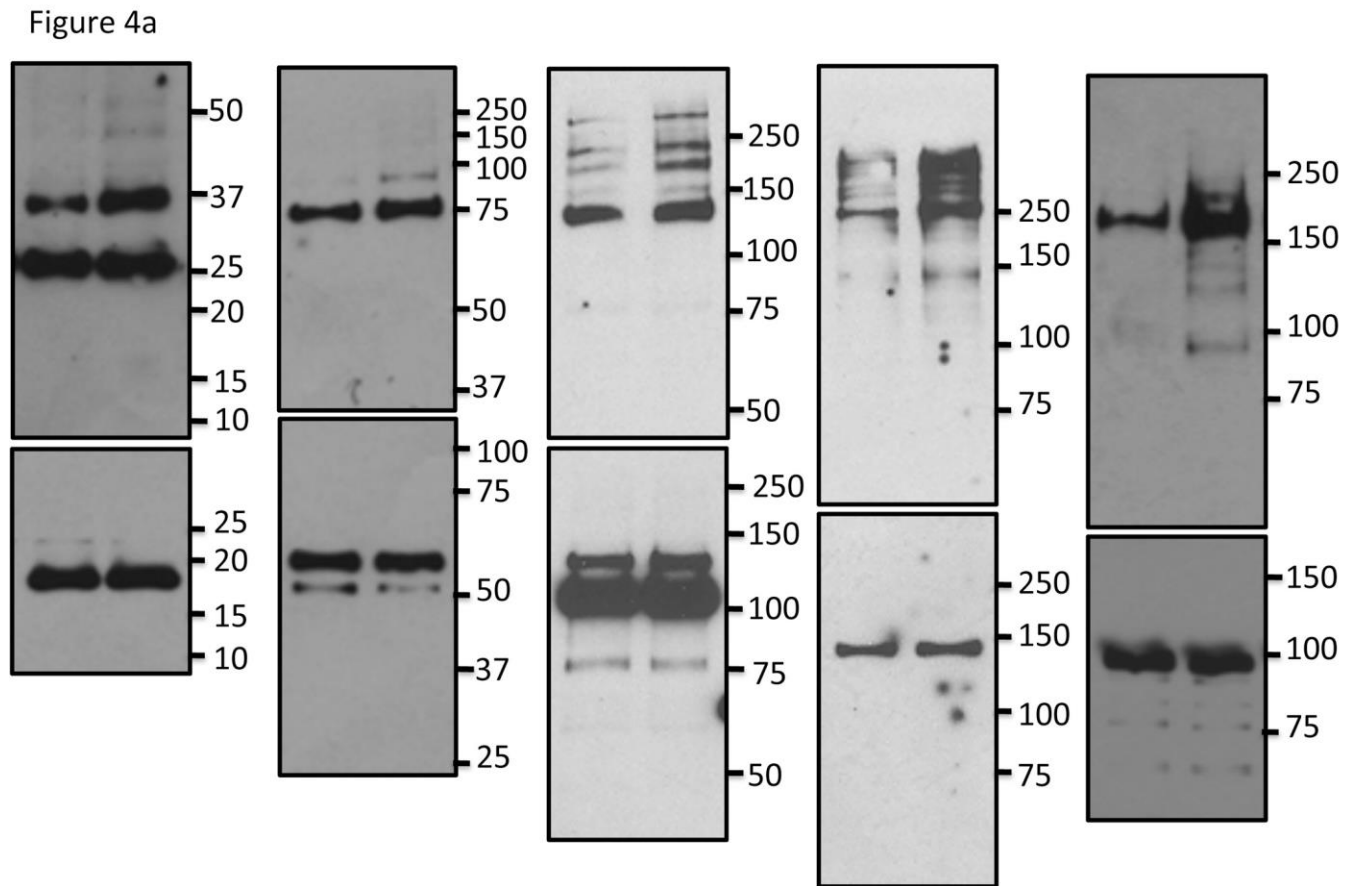

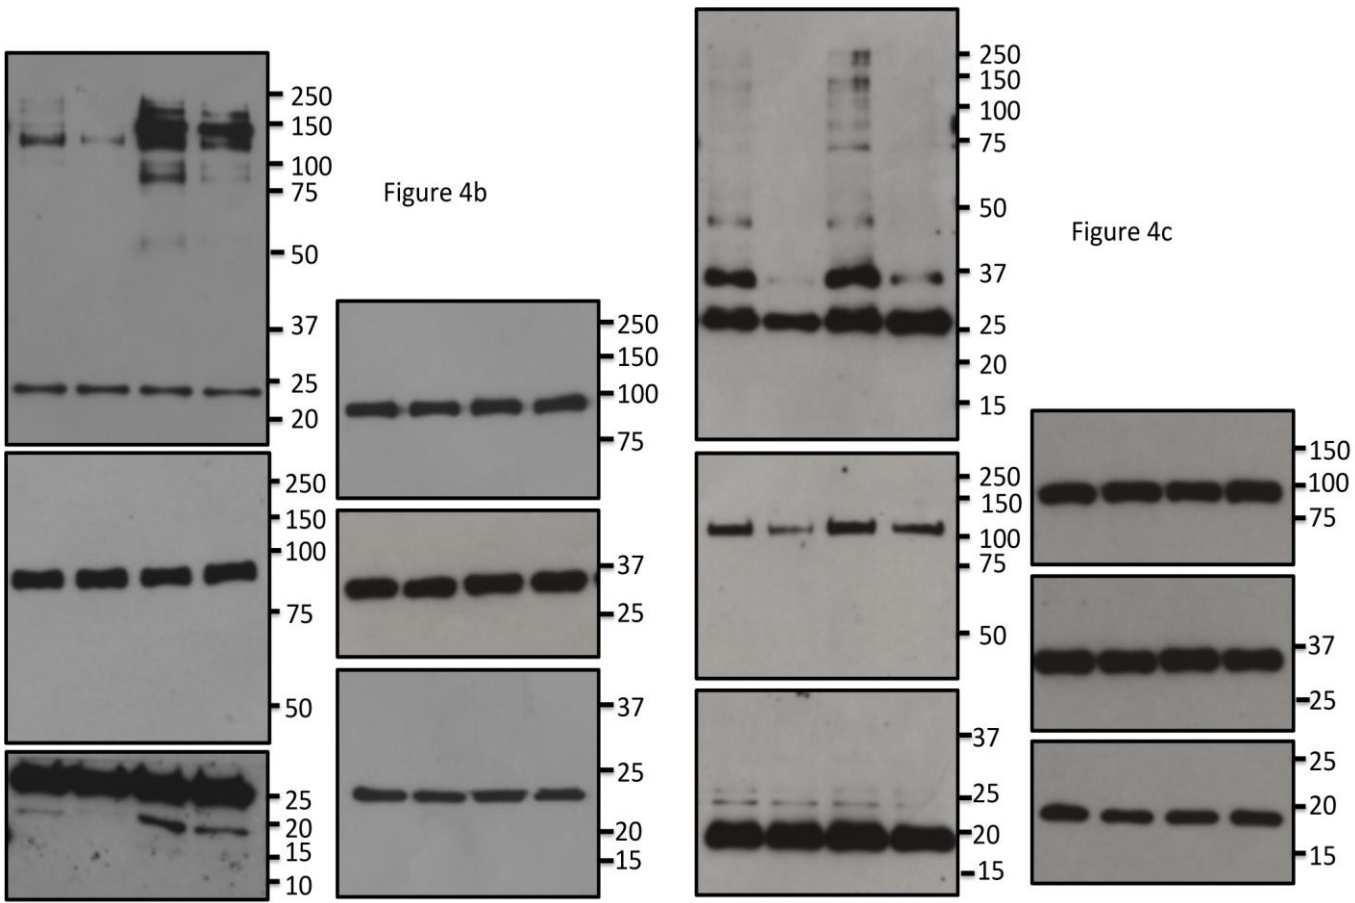

Uncropped Western blot scans of Figures 1a, 1b, 4a, 4b and 4c



**Supplementary Table 1 Yeast strains used in this study**

| Strain                                                                                                                                                        | Genotype                                                                             | Source     |
|---------------------------------------------------------------------------------------------------------------------------------------------------------------|--------------------------------------------------------------------------------------|------------|
| The following strains are derived from the YPH499 strain ( <i>MATa ura3-52 lys2-801<sup>amber</sup> ade2-101<sup>ochre</sup> trp1-Δ63 his3-Δ200 leu2-Δ1</i> ) |                                                                                      |            |
| CHNM1                                                                                                                                                         | <i>TUP1::TUP1-6HA-K. lactis TRP1</i>                                                 | This study |
| CHNM2                                                                                                                                                         | <i>CYC8::CYC8-6HA-K. lactis TRP1</i>                                                 | This study |
| CHNM3                                                                                                                                                         | <i>GAL11::GAL11-6HA-K. lactis TRP1</i>                                               | This study |
| CHNM4                                                                                                                                                         | <i>GCN5::GCN5-6HA-K. lactis TRP1</i>                                                 | This study |
| CHNM5                                                                                                                                                         | <i>HHT1::HHT1-6HA-K. lactis TRP1</i>                                                 | This study |
| CHNM6                                                                                                                                                         | <i>CTI6::CTI6-6HA-K. lactis TRP1</i>                                                 | This study |
| CHNM7                                                                                                                                                         | <i>TUP1::TUP1-6HA-K270R-K. lactis TRP1</i>                                           | This study |
| CHNM8                                                                                                                                                         | <i>TUP1::TUP1-6HA-K611R-K. lactis TRP1</i>                                           | This study |
| CHNM9                                                                                                                                                         | <i>TUP1::TUP1-6HA-K. lactis TRP1 gcn4Δ::kanMX [pGCN4-6HA/CEN URA3]</i>               | This study |
| CHNM10                                                                                                                                                        | <i>TUP1::TUP1-6HA-K. lactis TRP1 gcn4Δ::kanMX [pGCN4-6HA-K50,58R/CEN URA3]</i>       | This study |
| CHNM11                                                                                                                                                        | <i>TUP1::TUP1-6HA-K270R-K. lactis TRP1 gcn4Δ::kanMX [pGCN4-6HA/CEN URA3]</i>         | This study |
| CHNM12                                                                                                                                                        | <i>TUP1::TUP1-6HA-K270R-K. lactis TRP1 gcn4Δ::kanMX [pGCN4-6HA-K50,58R/CEN URA3]</i> | This study |
| CHNM13                                                                                                                                                        | <i>tup1Δ::kanMX [pTUP1-6HA/CEN URA3]</i>                                             | This study |
| CHNM14                                                                                                                                                        | <i>tup1Δ::kanMX [pTUP1-6HA-K229R/CEN URA3]</i>                                       | This study |
| CHNM15                                                                                                                                                        | <i>tup1Δ::kanMX [pTUP1-6HA-K270R/CEN URA3]</i>                                       | This study |
| CHNM16                                                                                                                                                        | <i>tup1Δ::kanMX [pTUP1-6HA-K229,270R/CEN URA3]</i>                                   | This study |
| CHNM17                                                                                                                                                        | <i>TUP1::TUP1-6HA-K. lactis TRP1 GAL11::GAL11-FLAG kanMX</i>                         | This study |
| CHNM18                                                                                                                                                        | <i>TUP1::TUP1-6HA-K270R-K. lactis TRP1 GAL11::GAL11-FLAG kanMX</i>                   | This study |
| CHNM19                                                                                                                                                        | <i>TUP1::TUP1-6HA-K. lactis TRP1 GCN5::GCN5-FLAG kanMX</i>                           | This study |
| CHNM20                                                                                                                                                        | <i>TUP1::TUP1-6HA-K270R-K. lactis TRP1 GCN5::GCN5-FLAG kanMX</i>                     | This study |
| CHNM21                                                                                                                                                        | <i>TUP1::TUP1-6HA-K. lactis TRP1 HHT1::HHT1-FLAG kanMX</i>                           | This study |

|                                                                                                                  |                                                                              |            |
|------------------------------------------------------------------------------------------------------------------|------------------------------------------------------------------------------|------------|
| CHM22                                                                                                            | <i>TUP1::TUP1-6HA-K270R-K. lactis TRP1 HHT1::HHT1-FLAG kanMX</i>             | This study |
| The following strains are derived from the strains used in Bylebyl et al. 2003.                                  |                                                                              |            |
| CHNM23                                                                                                           | <i>MATa trp1-Δ1 ura3-52 his3-Δ200 leu2-3,112 lys2-801[pTUP1-HA/CEN URA3]</i> | This study |
| CHNM24                                                                                                           | <i>MATa smt3-R11,15,19::TRP1[pTUP1-HA/CEN URA3]</i>                          | This study |
| CHNM25                                                                                                           | <i>MATa smt3-R38,40,41::TRP1[pTUP1-HA/CEN URA3]</i>                          | This study |
| The following strains are derived from W303a ( <i>MATa leu2-3,112 trp1-1 can1-100 ura3-1 ade2-1 his3-11,15</i> ) |                                                                              |            |
| CHNM26                                                                                                           | <i>TFG1::TFG1-6HA-K. lactis TRP1</i>                                         | This study |
| The following strains are derived from BY4741 ( <i>MATa his3Δ0 leu2Δ0 met15Δ0 ura3Δ0</i> )                       |                                                                              |            |
| YAA018                                                                                                           | <i>TUP1:TUP1-3HA-HIS3MX6</i>                                                 | This study |
| YAA019                                                                                                           | <i>slx5Δ::kanMX TUP1:TUP1-3HA-HIS3MX6</i>                                    | This study |
| YAA020                                                                                                           | <i>rad18Δ::kanMX TUP1:TUP1-3HA-HIS3MX6</i>                                   | This study |

**Supplementary Table 2 Primers sequences used in this study**

| Primer name      | Primer sequence                                                         | Note                                                |
|------------------|-------------------------------------------------------------------------|-----------------------------------------------------|
| Tup1F-HA-Trp     | GATTGTAAAGCAAGGATTTGGAAGTATAAAAAAATAGC<br>GCCAAATCGTACGCTGCAGGTCGAC     | HA-tagging<br>of Tup1                               |
| Tup1R-HA-Trp     | GTTTAGTTAGTTACATTTGTAAAGTGTTCCTTTTGTGTTC<br>TGTTCAATCGATGAATTCGAGCTCG   |                                                     |
| Cyc8F-HA-Trp     | GAAAATGTAGTAAGGCAAGTGGAGAAGATGAAAAC<br>ACGACGACCGTACGCTGCAGGTCGAC       | HA-tagging<br>of Cyc8                               |
| Cyc8R-HA-Trp     | TCGTTGATTATAAATTAGTAGATTAATTTTTTGAATGCA<br>AACTTTATCGATGAATTCGAGCTCG    |                                                     |
| Gal11F-HA-Trp    | GAACAATTC AATGTATGGGATTGGAATAATTGGACAAG<br>TGCTACTCGTACGCTGCAGGTCGAC    | HA-tagging<br>of Gal11                              |
| Gal11R-HA-Trp    | ACGAAGTAACTTCAAAGTATCAAAGTATGGAACTT<br>CAAATGTATCGATGAATTCGAGCTCG       |                                                     |
| Gcn5F-HA-Trp     | AATAATAAAGTAAAAGAAATACCTGAATATTCTCACCT<br>TATTGATCGTACGCTGCAGGTCGAC     | HA-tagging<br>of Gcn5                               |
| Gcn5R-HA-Trp     | TTTCTTCTTCGAAAGGAATAGTAGCGGAAAAGCTTCTTC<br>TACGCAATCGATGAATTCGAGCTCG    |                                                     |
| Hht1F-HA-Trp     | CAAAAGAAGGATATCAAGTTGGCTAGAAGATTAAGAG<br>GTGAAAGATCACGTACGCTGCAGGTCGAC  | HA-tagging<br>of Hht1                               |
| Hht1R-HA-Trp     | TATTGTGTTTTTGTTCGTTTTTTACTAAAACGTATGACA<br>ATCAACAAAATCGATGAATTCGAGCTCG |                                                     |
| Cti6F-HA-Trp     | CTACTATGGGAGAAAAAATATTCAAATAACACTAATGC<br>CATTCAACGTACGCTGCAGGTCGAC     | HA-tagging<br>of Cti6                               |
| Cti6R-HA-Trp     | ATTACAGTTATACTTTGGTTGAGAATAATATTGCAGTGT<br>TTGCGATCGATGAATTCGAGCTCG     |                                                     |
| Tup1-K229R-F-Int | GAGACCACTACTTTACCCTCTGTCA <u>GGG</u> CACCTGAATC<br>TACGTTGAAAGAA        | Creation of<br>integrative<br>Tup1<br>mutations     |
| Tup1-K270R-F-Int | GCAACTGAACTGAAATCAAACCTA <u>GGG</u> GAGGAAGACG<br>CCACCCCGGCTAGT        |                                                     |
| Tup1-K611R-F-Int | TGGAATTTGCAGAAATGCAAACAAC <u>AGG</u> GAGCGATTCTGA<br>AAACTCCAAATTCC     |                                                     |
| Tup1-R-Int       | GAATAGTTT TAGTTAGTTACATTTGTAAAGTGTTCCTTTT<br>GTGTTCTGTTC                |                                                     |
| Tup1-K229-LF     | CCCTCTGTCAG <u>GGG</u> CACCTGAATCTACGTTGAAAGAAA<br>CTGAACCG             | Creation of<br>Tup1-K229R<br>mutation<br>using SLIM |
| Tup1-K229-SF     | <b>TCTACGTTGAAAGAACTGAACCG</b>                                          |                                                     |
| Tup1-K229-LR     | TTCAGGTGCC <u>C</u> TGACAGAGGGTAAAGTAGTGGTCTCT<br>TTAGAAGTAGGAG         |                                                     |
| Tup1-K229-SR     | <b>TAAAGTAGTGGTCTCTTTAGAAGTAGGAG</b>                                    |                                                     |
| Tup1-K270-LF     | ATCAAACCTA <u>GGG</u> GAGGAAGACGCCACCCCGGCTAGT<br>TTG                   | Creation of<br>Tup1-K270R<br>mutation<br>using SLIM |
| Tup1-K270-SF     | <b>GCCACCCCGGCTAGTTTG</b>                                               |                                                     |
| Tup1-K270-LR     | GTCTTCC <u>T</u> CCTAGGTTTGATTTTCAGTTTCAGTTGCGG<br>TGGTAGT              |                                                     |
| Tup1-K270-SR     | <b>TTCAGTTTCAGTTGCGGTGGTAGT</b>                                         |                                                     |
| Tup1-K611-LF     | AACAGGAGCGATTTCGAAAACCTCAAATTCGGCACTT<br>GTGAAG                         | Creation of<br>Tup1-K611R<br>mutation<br>using SLIM |
| Tup1-K611-SF     | <b>CAAATTCGGCACTTGTGAAG</b>                                             |                                                     |
| Tup1-K611-LR     | AGTTTTCGAATCGCTC <u>T</u> GTGTTGTTGCATTCTGCAAAT<br>TCCAGA               |                                                     |
| Tup1-K611-SR     | <b>GTTTGCATTCTGCAAATTCAGA</b>                                           |                                                     |
| pFA6a-Gal11F     | GAACAATTC AATGTATGGGATTGGAATAATTGGACAAG                                 | Flag-tagging                                        |

|              |                                                                                |                         |                        |
|--------------|--------------------------------------------------------------------------------|-------------------------|------------------------|
|              | <b>TGCTACTGGGGGAGGCGGGGGTGGGA</b>                                              | of Gal11                |                        |
| pFA6a-Gal11R | ACGAAGTAACTTCAAAAAGTATCAAAAAGTATGGAACTT<br><b>CAAATGTGAATTCGAGCTCGTTTAAAC</b>  |                         |                        |
| pFA6a-Gcn5F  | AATAATAAAGTAAAAGAAATACCTGAATATTCTCACCT<br><b>TATTGATGGGGGAGGCGGGGGTGGGA</b>    | Flag-tagging<br>of Gcn5 |                        |
| pFA6a-Gcn5R  | TTTCTTCTTCGAAAGGAATAGTAGCGGAAAAGCTTCTTC<br><b>TACGCGAATTCGAGCTCGTTTAAAC</b>    |                         |                        |
| pFA6a-Hht1F  | AAGAAGGATATCAAGTTGGCTAGAAGATTAAGAGGTG<br><b>AAAGATCAGGGGGAGGCGGGGGTGGGA</b>    | Flag-tagging<br>of Hht1 |                        |
| pFA6a-Hht1R  | TGTGTTTTTGTTCGTTTTTTTACTAAAACCTGATGACAATC<br><b>AACAAAGAATTCGAGCTCGTTTAAAC</b> |                         |                        |
| Cpa2F        | CCACTGTCTTCTTTCCTGCGGC                                                         | ChIP analysis           |                        |
| Cpa2R        | GATGCTTAAACTTAAATAGCGC                                                         |                         |                        |
| Arg1A-F      | GATAGTGTAATCTGAGCAGTTG                                                         |                         |                        |
| Arg1A-R      | GTATCTAAACCACCAGAATAAGC                                                        |                         |                        |
| Arg1B-F      | GTAATGATCAAATCAGATTTCG                                                         |                         |                        |
| Arg1B-R      | GGTCAAATCTTGTGGTTGGTCCG                                                        |                         |                        |
| Arg1C-F      | GACTTTAGACAAAGAAGTCCG                                                          |                         |                        |
| Arg1C-R      | GTATCGGTAGGTAAGAAACCG                                                          |                         |                        |
| Arg1D-F      | CATCGCCTCAAGATAGATAACG                                                         |                         |                        |
| Arg1D-R      | GAGGACTTAATGGTGCAGTGC                                                          |                         |                        |
| Tel-VI-F     | GCTGAGTTTAAACGGTGATTATTAGG                                                     |                         |                        |
| Tel-VI-R     | CCAGTCCTCATTTCATCAATAG                                                         |                         |                        |
| Arg1F+454    | AGATTTGCTGGCAGAAAGGA                                                           |                         | Quantitative<br>RT-PCR |
| Arg1R+609    | CTTTGGTGGGGTGGTATCTG                                                           |                         |                        |
| Cpa2F+102    | TGGATCAGGAGGGCTCTCTA                                                           |                         |                        |
| Cpa2R+280    | ATTCTGGTGTAAACGGGCAAG                                                          |                         |                        |
| 25s-F        | CAAGTGCACCGTTGCTAGC                                                            |                         |                        |
| 25s-R        | GCCTCTAAGTCAGAATCCATGC                                                         |                         |                        |
